# Supplementary material for: Temperature dependence of the gas-particle partitioning of selected VOCs
Source: Royal Society of Chemistry journal article supplement (doi:10.1039/d1em00176k), 2021-01-01
Supplement: d1em00176k1.pdf [file d1em00176k1.pdf]

# 1 Temperature dependence of the gas-particle 2 partitioning of selected VOCs

3 Jeonghyeon Ahn, Guiying Rao, and Eric Vejerano\*

4 Center for Environmental Nanoscience and Risk, Department of Environmental Health Sciences,

5 University of South Carolina, Columbia, 29208

6

7 **Keywords:** *enthalpy; atmospheric aerosols; succinic acid; ammonium sulfate; organic; inorganic*

8

9 **Propagation of error.** For the 1,2-DCB and TCE, the error ( $\sigma$ ) was propagated using the following  
10 equations:

11 
$$\sigma_{\Delta H_{des} (kJ mol^{-1})} = \pm \sigma_{slope} R \times 10^{-3} \quad (\text{Equation S1}) \text{ and}$$

12 
$$\sigma_{\Delta S_{des} (kJ mol^{-1})} = \pm \sigma_{intercept} R \times 10^{-3} \quad (\text{Equation S2}).$$

13 For *n*-BuOH, the error was propagated as

14 
$$\sigma_{\Delta H_{des} (kJ mol^{-1})} = \pm \left( \sigma_b^2 \left| \frac{\partial \Delta H_{des}}{\partial b} \right|^2 + \sigma_c^2 \left| \frac{\partial \Delta H_{des}}{\partial c} \right|^2 \right)^{1/2} \quad (\text{Equation S3})$$

15 resulting to

16 
$$\sigma_{\Delta H_{des} (kJ mol^{-1})} = \pm \left[ \left( \sigma_b^2 R^2 + \sigma_c^2 \left| \frac{2R}{T} \right|^2 \right) \cdot 10^{-3} \right]^{1/2} \quad (\text{Equation S4}).$$

17 Whereas the propagated errors for *n*-BuOH were determined using

18 
$$\sigma_{\Delta S_{des} (kJ mol^{-1})} = \pm \left( \sigma_a^2 \left| \frac{\partial \Delta S_{des}}{\partial a} \right|^2 + \sigma_c^2 \left| \frac{\partial \Delta S_{des}}{\partial c} \right|^2 \right)^{1/2} \quad (\text{Equation S5})$$

19 resulting to

$$20 \quad \sigma_{\Delta S_{des}} = \pm \left[ \left( \sigma_a^2 R^2 + \sigma_c^2 \left| \frac{R}{T^2} \right|^2 \right) \cdot 10^{-3} \right]^{1/2} \quad (\text{Equation S6}).$$

21  $R$  and  $T$  are the ideal gas constant (8.314 J mol<sup>-1</sup> K<sup>-1</sup>) and absolute temperature (K), respectively. The  
22 factor 10<sup>-3</sup> in the equations results from converting J to kJ as we reported in the main texts that the  
23 thermodynamic properties have units of kJ mol<sup>-1</sup>. The uncertainties in the parameters,  $a$ ,  $b$ ,  $c$ , *slope*, and  
24 *intercept* are summarized in **Tables 2** and **3**, which were obtained from the fit. Uncertainties were taken as  
25 one standard deviation from the mean. Fitting was performed using *Igor Pro*<sup>TM</sup>. We assume that the  
26 uncertainty in temperature was negligible ( $\sigma_T \sim 0.01$  K) as we precisely controlled it. The uncertainty in  
27  $\Delta H_{des}$  and  $\Delta S_{des}$  increased with an increase in temperature. The increase in uncertainty was due to the smaller  
28 mass fraction of the VOCs partitioning into the aerosols at higher temperatures. The propagated  
29 uncertainties for  $\Delta H_{des}$  and  $\Delta S_{des}$  were on average  $\sim 6\times$  lower for *n*-BuOH partitioning of Am Sulf than on  
30 SA.

31 **Expansion of  $\ln D_p$  as a Taylor series.** Rewriting the equation,

$$32 \quad \ln D_p = \ln \left( 1 + e^{-\Delta G_{2,1}^0/RT} \right) - \frac{\Delta G_1^0}{RT} \quad (\text{Equation 10})$$

33 to

$$34 \quad \ln D_p = \ln (1 + e^{-\alpha x}) - \beta x,$$

$$35 \quad \text{where } \alpha = \frac{\Delta G_{2,1}^0}{R}, \beta = \frac{\Delta G_1^0}{R}, \text{ and } x = \frac{1}{T}.$$

36 Expansion as a series at  $x=0$  yields

$$37 \quad \ln D_p = \ln 2 + \left( -\frac{\alpha}{2} - \beta \right) x + \left( \frac{\alpha^2}{8} \right) x^2 - \left( \frac{\alpha^4}{192} \right) x^4 + \left( \frac{\alpha^6}{2880} \right) x^6 + O(x^8)$$

38 where  $O(x^8)$  are the higher order terms  $n>6$ .

39 The general solution can be written as

40 
$$\ln D_p = a + bx + cx^2 + dx^4 + ex^6 \dots, \text{ (Equation 11)}$$

41 where  $a, b, c, d, e, \dots$  are the coefficients.
